# Supplementary material for: Analysis of Oral Anticoagulant Dosing and Adherence to Therapy Among Patients With Nonvalvular Atrial Fibrillation
Source: PubMed Central journal article supplement — JAMA Netw Open. 2023 Jun 7;6(6):e2317156. doi: 10.1001/jamanetworkopen.2023.17156 (PMC10248740; doi:10.1001/jamanetworkopen.2023.17156), 2023-06-07
Supplement: jamanetwopen-e2317156-s002.pdf [file jamanetwopen-e2317156-s002.pdf]

## Data Sharing Statement

Rymer. Analysis of Oral Anticoagulant Dosing and Adherence to Therapy Among Patients With Nonvalvular Atrial Fibrillation. *JAMA Netw Open*. Published June 07, 2023.

doi:10.1001/jamanetworkopen.2023.17156

### Data

**Data available:** No

### Additional Information

**Explanation for why data not available:** We cannot make individual patient-level data available, but are able to take reasonable requests to make cohort data available. These requests will need to be made to Symphony/ICON health.
